# Supplementary material for: Nephronectin-integrin α8 signaling is required for proper migration of periocular neural crest cells during chick corneal development
Source: eLife journal article supplement (doi:10.7554/elife.74307), 2022-03-03

Figure 2-figure supplement 1C Source Data

**Npnt-kd**

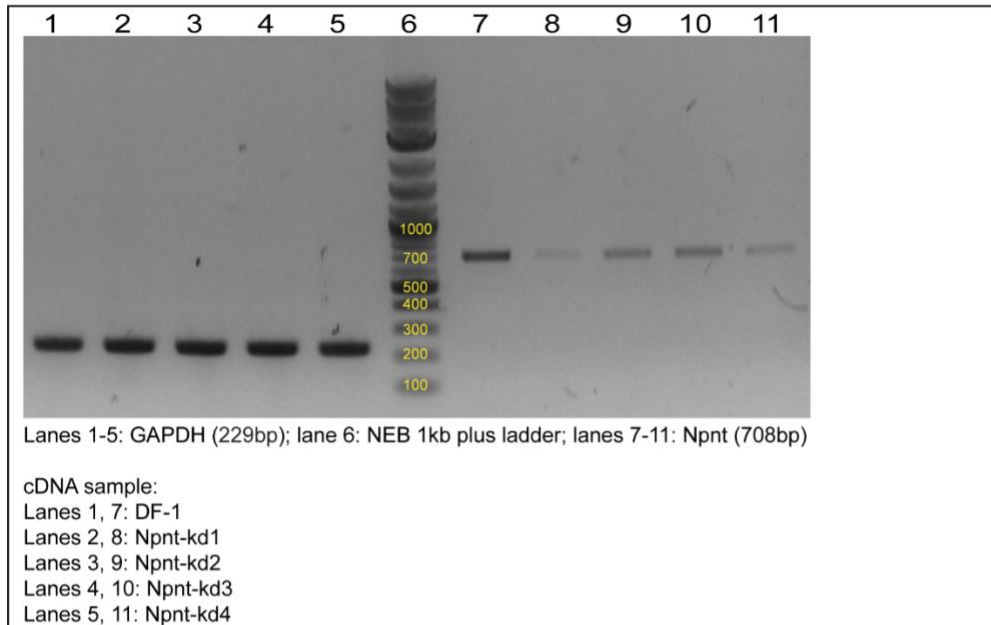

**Itga8-kd**

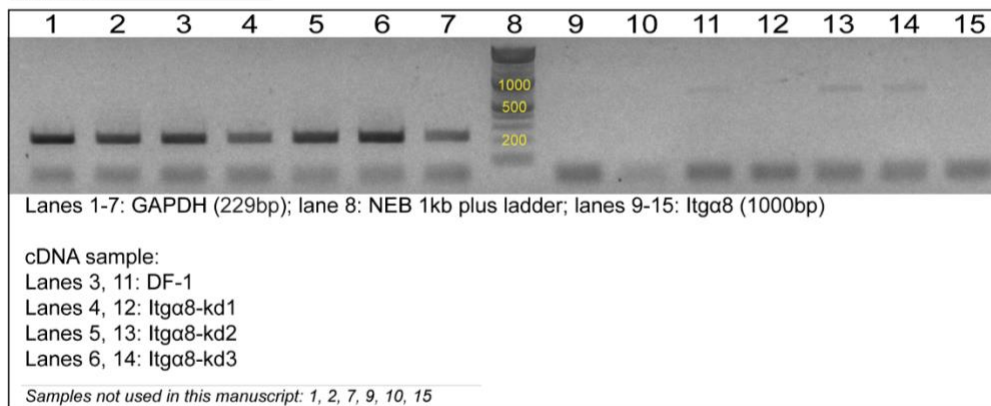

**Npnt-OE**

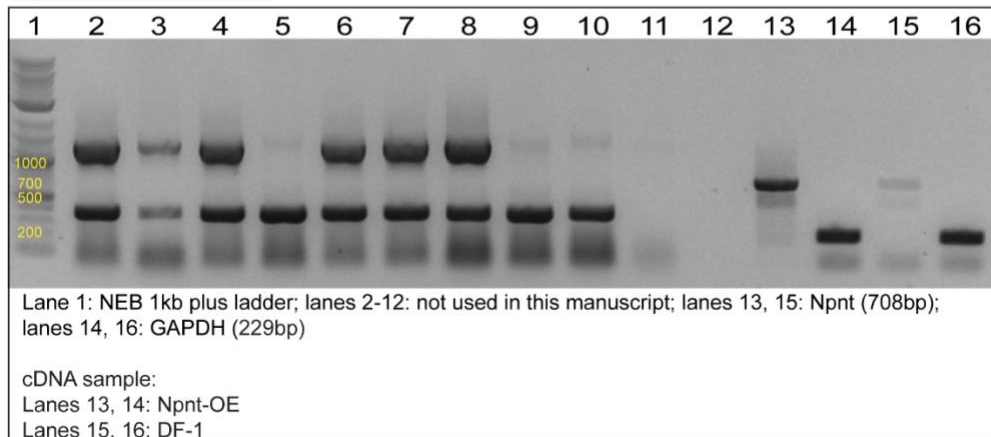

Supplement: data2 [file elife-74307-data2-v2.pdf]
