# Supplementary material for: Nephronectin-integrin α8 signaling is required for proper migration of periocular neural crest cells during chick corneal development
Source: eLife. 2022 Mar 3;11:e74307. doi: 10.7554/eLife.74307 (PMC8916771; doi:10.7554/eLife.74307)
Supplement: Source data 1. [file elife-74307-data1.xlsx]

## Sheet: Fig.2F
	Thickness (µm)
	Replicate	control	Npnt-kd
	1	60.65	35.48
	2	70.97	54.84
	3	72.58	30.65
	4	70.97	44.52
	5	77.42
	mean	70.518	41.3725
	SEM	2.73565	5.33052
	Statistical Significance
	Unpaired Student's t-test		P-value	Sig?
	Sample1	Sample2
	control	Npnt-kd	0.00126751	**

## Sheet: Fig.3G
	Cell Density (cells/mm2)
	Replicate	Npnt	Npnt+inh
	1	1306.12	457.143
	2	751.02	326.531
	3	1175.51	751.02
	4	1077.55	685.714
	5	1273.47	914.286
	6	685.714	457.143
	mean	1044.9	598.639
	SEM	108.626	90.2811
	Statistical Significance
	Unpaired Student's t-test		P-value	Sig?
	Sample1	Sample2
	Npnt	Npnt+inh	0.0101681	*

## Sheet: Fig.4E thickness
	Thickness (µm)
	Replicate	control	Itgα8-kd
	1	60.6452	43.871
	2	70.9677	46.129
	3	72.5806	73.5484
	4	70.9677	23.871
	5	77.4194	54.5161
	6		38.3871
	mean	70.5161	46.7204
	SEM	2.73643	6.78362
	Statistical Significance
	Unpaired Student's t-test		P-value	Sig?
	Sample1	Sample2
	control	Itga8-kd	0.0146282	*

## Sheet: Fig.4E count
	Cell Count
	Replicate	control	Itgα8-kd
	1	188	100
	2	220	123
	3	225	140
	4	120	38
	5	118	125
	6		72
	mean	174.2	99.6667
	SEM	23.4145	15.6858
	Statistical Significance
	Unpaired Student's t-test		P-value	Sig?
	Sample1	Sample2
	control	Itga8-kd	0.023368	*

## Sheet: Fig.4E density
	Cell Density (cells/mm2)
	Replicate	control	Itgα8-kd
	1	24031	17669.9
	2	24031	20670
	3	24031	14755.9
	4	13107.8	12340.2
	5	11815.2	17774.4
	6		14539.8
	mean	19403.2	16291.7
	SEM	2841.29	1215.31
	Statistical Significance
	Unpaired Student's t-test		P-value	Sig?
	Sample1	Sample2
	control	Itga8-kd	0.310495	ns

## Sheet: Fig.4H
	%BrdU (BrdU+/total cells)
	Replicate	control	Itgα8-kd
	1	16.5663	13.9831
	2	22.1312	17.4847
	3	13.5593	10.7143
	4	17.8571	10.4
	5	13.5593	20.1389
	6	17.8571
	7	20
	mean	17.3615	14.5442
	SEM	1.19272	1.89874
	Statistical Significance
	Unpaired Student's t-test		P-value	Sig?
	Sample1	Sample2
	control	Itga8-kd	0.214633	ns

## Sheet: Fig.5G
		Thickness (µm)
			E7		E9		E15
		Replicate	control	Npnt-OE	control	Npnt-OE	control	Npnt-OE
		1	153	129	161.29	281.29	237	330.968
		2	152	189	249.677	310.32	269	312.903
		3	208.39	112	183.871	515.16	205	482.258
		4	216.13	122.58	145.161	369.68	208	281.29
		5	129	129.03	154.194	436.45	245	382.258
		6	139	132.26	188.387	475	231	417.419
		7	180	159.68	222.26	457		449.032
		8	192.26	145.16		293		490.323
		9	117.74	154.84		282		290.323
		10	127.42	145.16		268.71
		11				280.32
		12				248.39
		mean	161.494	141.871	186.406	351.443	232.5	381.864
		SEM	11.1917	7.00435	14.3666	27.2675	9.77667	27.2486
		Statistical Significance
		Unpaired Student's t-test		P-value	Sig?
		Sample1	Sample2
		E7 control	E7 Npnt-OE	0.154514	ns
		E9 control	E9 Npnt-OE	0.000410258	***
		E15 control	E15 Npnt-OE	0.000854709	***

## Sheet: Fig.5H
	Cell Count
		E7		E9		E15
	Replicate	control	Npnt-OE	control	Npnt-OE	control	Npnt-OE
	1	121	143	232	320	237	205
	2	129	145	263	336	269	282
	3	156	138	236	432	212	357
	4	115	154	200	414	238	283
	5	144	133	191	412	240	318
	6	116	166	241	296	242	243
	7	182	134	256	308		263
	8	191	156		277		341
	9	173	155		276		382
	10	159	133		303
	11				369
	12
	mean	148.6	145.7	231.286	340.273	239.667	297.111
	SEM	8.8383	3.65164	10.1599	17.2611	7.3967	19.0609
	Statistical Significance
	Unpaired Student's t-test		P-value	Sig?
	Sample1	Sample2
	E7 control	E7 Npnt-OE	0.765174	ns
	E9 control	E9 Npnt-OE	0.000250626	***
	E15 control	E15 Npnt-OE	0.0347738	*

## Sheet: Fig.5I
	Cell Density (cells/mm2)
		E7 control		E7 Npnt-OE		E9 control		E9 Npnt-OE		E15 control		E15 Npnt-OE
	Replicate	anterior	posterior	anterior	posterior	anterior	posterior	anterior	posterior	anterior	posterior	anterior	posterior
	1	12414.1	3908.15	14023.4	7126.63	17916.3	11041.5	21666.3	6874.87	11858.3	9825.45	7792.6	5082.13
	2	10804.9	5977.18	13563.6	4138.05	18541.3	5416.57	21041.3	6874.87	9656.04	7792.6	12027.7	7623.19
	3	14253.3	2988.59	13563.6	6896.74	17499.7	9166.49	18541.3	5208.24	10164.2	7792.6	11688.9	7284.38
	4	9425.55	2988.59	12873.9	4138.05	16249.7	10416.5	21457.9	5208.24	12705.3	10164.2	11688.9	4743.32
	5	16322.3	5057.61	14023.4	5057.61	18124.7	9166.49	20416.3	4166.59	12197.1	7114.98	10164.2	5929.15
	6	16092.4	5287.5	14483.2	5057.61	20208	8333.18	18124.7	3124.94	12874.7	7962	9656.04	5929.15
	7	15632.6	10575	13333.7	4138.05			15416.4	3958.26
	8	14023.4	8046.2					18541.3	4374.92
	9							18541.3	7291.53
	10							21874.6	4999.91
	11							19791.3	2499.95
	mean	13621.1	5603.6	13695	5221.82	18089.9	8923.44	19583	4962.03	11576	8441.98	10503.1	6098.55
	SEM	896.44	923.597	199.768	488.226	530.911	805.81	593.248	469.902	550.962	507.113	666.227	471.094
	Statistical Significance
	Unpaired Student's t-test		P-value	Sig?
	Sample1	Sample2
	E7 control (anterior)	E7 Npnt-OE (anterior)	0.941087	ns
	E7 control (posterior)	E7 Npnt-OE (posterior)	0.732017	ns
	E9 control (anterior)	E9 Npnt-OE (anterior)	0.117886	ns
	E9 control (posterior)	E9 Npnt-OE (posterior)	0.000368688	***
	E15 control (anterior)	E15 Npnt-OE (anterior)	0.242925	ns
	E15 control (posterior)	E15 Npnt-OE (posterior)	0.00693648	**

## Sheet: Fig.5K
	%BrdU (BrdU+/total cells)
		E7		E9		E15
	Replicate	control	Npnt-OE	control	Npnt-OE	control	Npnt-OE
	1	30.99	24.13	15.26	8.33	0.97	0.843467
	2	21.32	22.76	11.3	11.59	1.18	0.408772
	3	14.74	26.45	18.7171	12.46	0.21	0.280112
	4	20.87	23.88	12.5389	13.73	0.42	0.706714
	5	16.48	15.38	10.7093	9.82		0
	6	19.37	24.19	11.3806	9.1		0.314465
	7	20.81	18.42	15.5172	7.81		1.12782
	8	25.47		9.26791	11.23		0.411523
	9			13.0975	8.96
	10
	11
	12
	mean	21.2563	22.1729	13.0876	10.3367	0.695	0.511609
	SEM	1.80122	1.46124	0.978731	0.671797	0.227614	0.126963
	Statistical Significance
	Unpaired Student's t-test		P-value	Sig?
	Sample1	Sample2
	E7 control	E7 Npnt-OE	0.704556	ns
	E9 control	E9 Npnt-OE	0.0340619	*
	E15 control	E15 Npnt-OE	0.460789	ns

[truncated: 7 more sheets: Fig.6C, Fig.6D, Fig.6E, Fig.7C, Fig.7D, Fig.7E, Fig.7H]
